# Supplementary material for: Pan-Genome and Comparative Genome Analyses of Propionibacterium acnes Reveal Its Genomic Diversity in the Healthy and Diseased Human Skin Microbiome
Source: PubMed Central journal article supplement — mBio. 2013 Apr 30;4(3):e00003-13. doi: 10.1128/mBio.00003-13 (PMC3663185; doi:10.1128/mbio.00003-13), 2013-04-30
Supplement: mbo002131499sf02.pdf [file mbo002131499sf02.pdf]

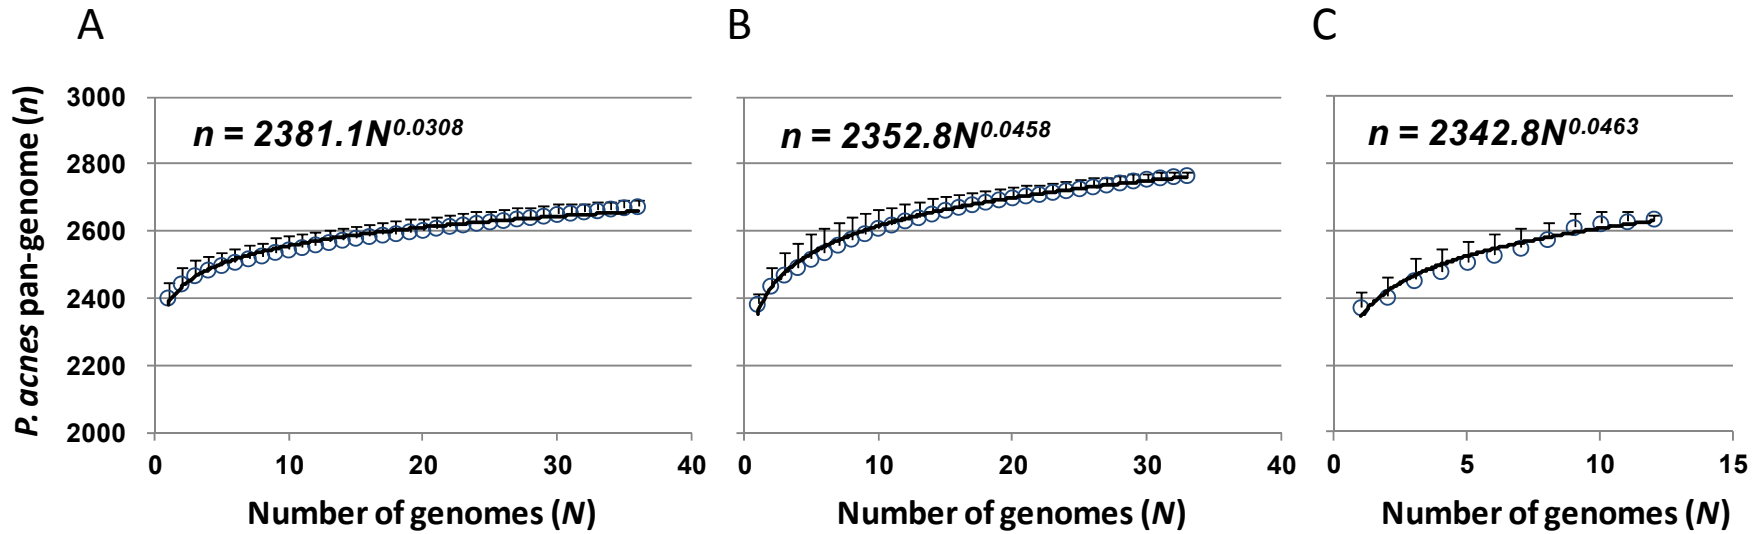

Figure S2. Pan-genomes of types IA (A), IB (B) and II (C) strains. Circles are the medians of  $n$  for 200 simulations. Error bars are standard deviations for the 200 simulations.
