# Supplementary material for: Pan-Genome and Comparative Genome Analyses of Propionibacterium acnes Reveal Its Genomic Diversity in the Healthy and Diseased Human Skin Microbiome
Source: PubMed Central journal article supplement — mBio. 2013 Apr 30;4(3):e00003-13. doi: 10.1128/mBio.00003-13 (PMC3663185; doi:10.1128/mbio.00003-13), 2013-04-30
Supplement: mbo002131499sf03.pdf [file mbo002131499sf03.pdf]

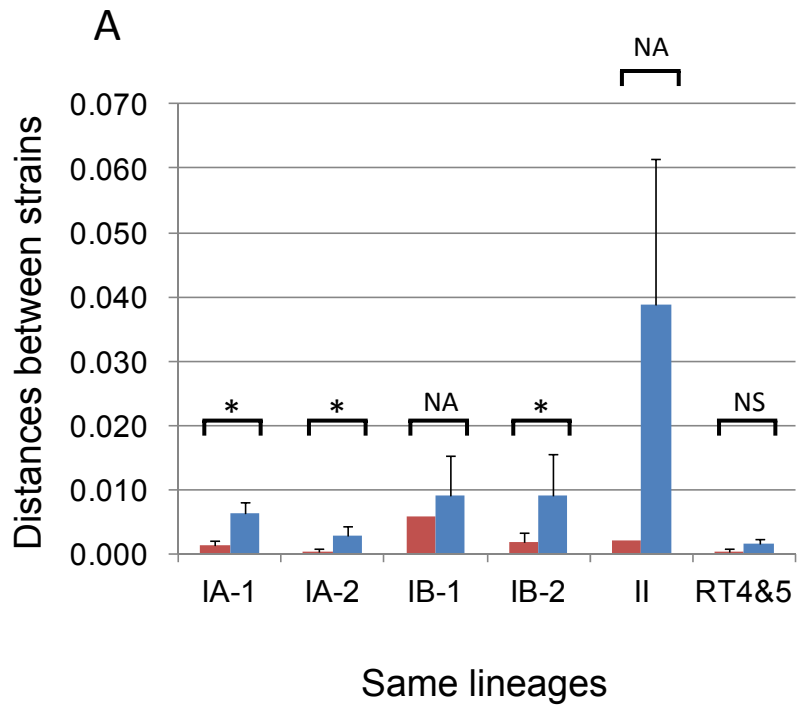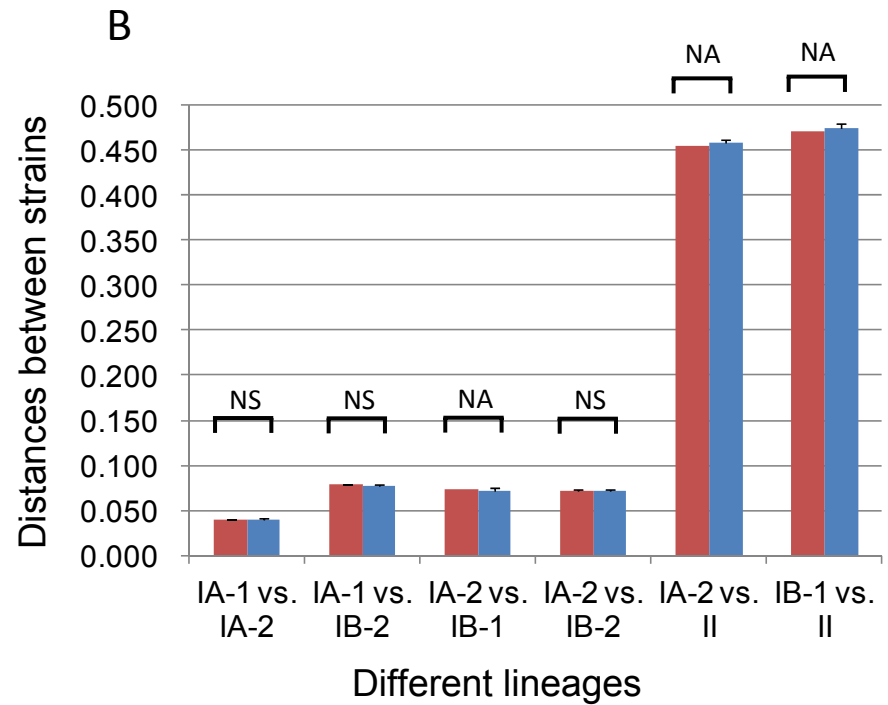

■ Strains isolated from the same individuals (SSIs)

■ Strains isolated from different individuals

\*  $p \leq 0.01$

NA: not available due to small sample number

NS: not significant ( $>0.05$ )

Figure S3. Distances between *P. acnes* strains in the same lineage (A) and in different lineages (B).
