# Supplementary material for: Pan-Genome and Comparative Genome Analyses of Propionibacterium acnes Reveal Its Genomic Diversity in the Healthy and Diseased Human Skin Microbiome
Source: PubMed Central journal article supplement — mBio. 2013 Apr 30;4(3):e00003-13. doi: 10.1128/mBio.00003-13 (PMC3663185; doi:10.1128/mbio.00003-13), 2013-04-30
Supplement: mbo002131499sf05.pdf [file mbo002131499sf05.pdf]

A

| Genetic Alteration                                       | KPA171202 Locus_tag | Product Name                     | Length (bp) | SK137 Locus_tag      | Product Name                         | Length (bp) |
|----------------------------------------------------------|---------------------|----------------------------------|-------------|----------------------|--------------------------------------|-------------|
| TAGATA deletion in type II<br>1base deletion at 124th nt | PPA1796*            | triacylglycerol lipase precursor | 1,020       | HMPREF0675_4855*     | triacylglycerol lipase               | 888         |
|                                                          | NA                  | NA                               | NA          | HMPREF0675_4856*     | triacylglycerol lipase               | 1,014       |
| TACA insertion in type IA/IB<br>at 505th nt              | PPA1425*            | putative lysophospholipase       | 1,134       | HMPREF0675_4479*     | putative Lysophospholipase L2        | 498         |
|                                                          |                     |                                  |             | HMPREF0675_4480*     | putative Lysophospholipase L2        | 168         |
|                                                          |                     |                                  |             | HMPREF0675_4481*     | putative Lysophospholipase L2        | 426         |
| 13bp insertion in IB-3/type II                           | PPA0594*            | putative lysophospholipase       | 939         | HMPREF0675_3655/3657 | hypothetical protein                 | 926         |
| 10C in SK137, normally 6C                                | PPA1761             | cardiolipin synthetase           | 1,269       | HMPREF0675_4816*     | phospholipase D domain protein       | 1,188       |
|                                                          |                     |                                  |             | HMPREF0675_4817      | hypothetical protein                 |             |
| Premature stop codon<br>at 170 th nt                     | PPA2142*            | putative lysophospholipase       | 1,122       | HMPREF0675_5205*     | lysophospholipase L2 domain protein  | 1,122       |
|                                                          |                     |                                  |             | HMPREF0675_5206*     | lysophospholipase L2                 |             |
| Conserved                                                | PPA1953*            | patatin-like phospholipase       | 1,503       | HMPREF0675_5014*     | phospholipase, patatin family        | 1,503       |
| Conserved                                                | PPA2036*            | lipase/acylhydrolase             | 909         | HMPREF0675_5101      | GDSL-like protein                    | 909         |
| Conserved                                                | PPA2105*            | triacylglycerol lipase precursor | 1,020       | HMPREF0675_5159*     | triacylglycerol lipase               | 1,020       |
| Conserved                                                | PPA1035*            | putative lipase                  | 1,287       | HMPREF0675_4093/4094 | hypothetical protein                 | 1,287       |
| Conserved                                                | PPA1101*            | putative esterase/lipase YbFf    | 819         | HMPREF0675_4163      | hydrolase, alpha/beta domain protein | 819         |
| Conserved                                                | PPA1967*            | putative lysophospholipase       | 957         | HMPREF0675_5031      | hydrolase, alpha/beta domain protein | 957         |
| Conserved                                                | PPA2312*            | lipase/esterase                  | 930         | HMPREF0675_5390      | hydrolase, alpha/beta domain protein | 930         |
| Conserved                                                | NA                  | NA                               | NA          | HMPREF0675_3037*     | phospholipase, patatin family        | 1,032       |

B

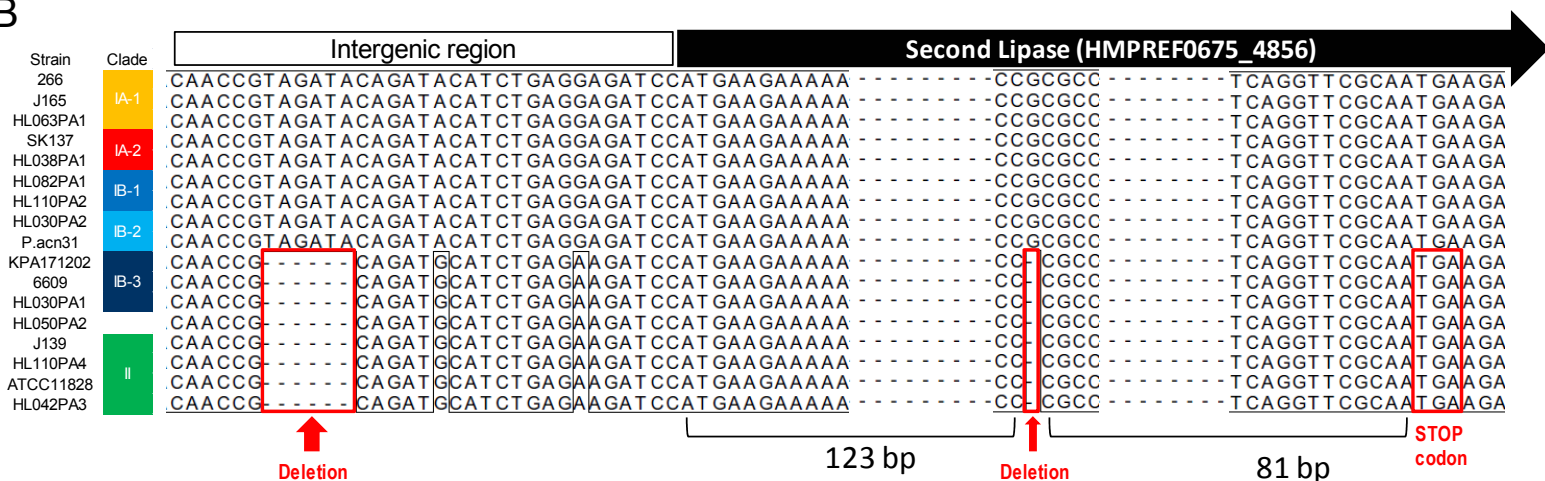

Figure S5. Genes with putative lipase activity in the *P. acnes* genomes. (A) Summary of 13 genes with putative lipase activity based on the annotations of KPA171202 and SK137 genomes. (B) Insertions/deletions and frameshift observed in ORF HMPREF0675-4856.
