# Supplementary material for: Pan-Genome and Comparative Genome Analyses of Propionibacterium acnes Reveal Its Genomic Diversity in the Healthy and Diseased Human Skin Microbiome
Source: PubMed Central journal article supplement — mBio. 2013 Apr 30;4(3):e00003-13. doi: 10.1128/mBio.00003-13 (PMC3663185; doi:10.1128/mbio.00003-13), 2013-04-30
Supplement: mbo002131499st1.pdf [file mbo002131499st1.pdf]

Table S1.  
Sequence types of the 82 *P. acnes* strains based on two MLST schemes.

NA: Not assigned or not available in the references due to novel sequence type or allele type.  
\* Sequence type or allele type was corrected from the one originally assigned in the references.  
\*\* closest allele

| Phylogenetic tree | Genome   |     |           |       | eMLST by McDowell <sup>13</sup> |                       |               |      |      |     |      |      |      |     | MLST by Lomholt <sup>11</sup> |      |                      |               |     |     |     |     |     |     |     |      |     |
|-------------------|----------|-----|-----------|-------|---------------------------------|-----------------------|---------------|------|------|-----|------|------|------|-----|-------------------------------|------|----------------------|---------------|-----|-----|-----|-----|-----|-----|-----|------|-----|
|                   | Genome   | RT  | RecA type | Clade | Type                            | Clonal complexes (CC) | Sequence type | aroE | atpD | gmk | guaA | lepA | sodA | tly | camp2                         | Type | Clonal clusters (CC) | Sequence type | cel | coa | tba | gms | lac | oxc | pak | recA | zno |
|                   |          |     |           |       |                                 |                       |               |      |      |     |      |      |      |     |                               |      |                      |               |     |     |     |     |     |     |     |      |     |
|                   | HL036PA1 | 532 | IA        | IA-1  | IA1                             | CC1                   | 1             | 1    | 1    | 1   | 3    | 1    | 1    | 1   | 1                             | I-1a | CC18                 | 8             | 5   | 9   | 2   | 8   | 4   | 3   | 3   | 5    | 5   |
|                   | HL036PA2 | 532 | IA        | IA-1  | IA1                             | CC1                   | 1             | 1    | 1    | 1   | 3    | 1    | 1    | 1   | 1                             | I-1a | CC18                 | 8             | 5   | 9   | 2   | 8   | 4   | 3   | 3   | 5    | 5   |
|                   | HL036PA3 | 1   | IA        | IA-1  | IA1                             | CC1                   | 1             | 1    | 1    | 1   | 3    | 1    | 1    | 1   | 1                             | I-1a | CC18                 | 8             | 5   | 9   | 2   | 8   | 4   | 3   | 3   | 5    | 5   |
|                   | HL005PA3 | 1   | IA        | IA-1  | IA1                             | CC1                   | 16            | 1    | 1    | 10  | 3    | 1    | 1    | 1   | 1                             | I-1a | CC18                 | 12            | 5   | 5   | 2   | 8   | 4   | 3   | 3   | 5    | 6   |
|                   | HL005PA2 | 1   | IA        | IA-1  | IA1                             | CC1                   | 15            | 1    | 1    | 10  | 3    | 1    | 1    | 6   | 1                             | I-1a | CC18                 | 12            | 5   | 5   | 2   | 8   | 4   | 3   | 3   | 5    | 6   |
|                   | HL020PA1 | 1   | IA        | IA-1  | IA1                             | CC1                   | 9             | 1    | 1    | 1   | 3    | 1    | 1    | 4   | 1                             | I-1a | CC18                 | 77            | 5   | 18  | 2   | 8   | 4   | 3   | 3   | 5    | 6   |
|                   | HL027PA2 | 1   | IA        | IA-1  | IA1                             | CC1                   | 1             | 1    | 1    | 1   | 3    | 1    | 1    | 1   | 1                             | I-1a | CC18                 | 12            | 5   | 5   | 2   | 8   | 4   | 3   | 3   | 5    | 6   |
|                   | HL100PA1 | 1   | IA        | IA-1  | IA1                             | CC1                   | 1             | 1    | 1    | 1   | 3    | 1    | 1    | 1   | 1                             | I-1a | CC18                 | 18            | 5   | 9   | 2   | 8   | 4   | 3   | 3   | 5    | 6   |
|                   | 266      | 1   | IA        | IA-1  | IA1                             | CC1                   | 20            | 5    | 1    | 1   | 3    | 1    | 1    | 1   | 1                             | I-1a | CC18                 | 18            | 5   | 9   | 2   | 8   | 4   | 3   | 3   | 5    | 6   |
|                   | HL013PA2 | 1   | IA        | IA-1  | IA1                             | CC1                   | 1             | 1    | 1    | 1   | 3    | 1    | 1    | 1   | 1                             | I-1a | CC18                 | 18            | 5   | 9   | 2   | 8   | 4   | 3   | 3   | 5    | 6   |
|                   | HL087PA2 | 1   | IA        | IA-1  | IA1                             | CC1                   | 1             | 1    | 1    | 1   | 3    | 1    | 1    | 1   | 1                             | I-1a | CC18                 | 18            | 5   | 9   | 2   | 8   | 4   | 3   | 3   | 5    | 6   |
|                   | HL063PA1 | 1   | IA        | IA-1  | IA1                             | CC1                   | 1             | 1    | 1    | 1   | 3    | 1    | 1    | 1   | 1                             | I-1a | CC18                 | 18            | 5   | 9   | 2   | 8   | 4   | 3   | 3   | 5    | 6   |
|                   | HL096PA3 | 1   | IA        | IA-1  | IA1                             | CC1                   | 8             | 1    | 1    | 1   | 3    | 1    | 1    | 3   | 1                             | I-1a | CC18                 | 18            | 5   | 9   | 2   | 8   | 4   | 3   | 3   | 5    | 6   |
|                   | J165     | 1   | IA        | IA-1  | IA1                             | CC1                   | 1             | 1    | 1    | 1   | 3    | 1    | 1    | 1   | 1                             | I-1a | CC18                 | 18            | 5   | 9   | 2   | 8   | 4   | 3   | 3   | 5    | 6   |
|                   | HL072PA2 | 5   | IA        | IA-1  | IA1                             | CC1                   | 1             | 1    | 1    | 1   | 3    | 1    | 1    | 1   | 1                             | I-1a | CC18                 | 18            | 5   | 9   | 2   | 8   | 4   | 3   | 3   | 5    | 6   |
|                   | HL072PA1 | 5   | IA        | IA-1  | IA1                             | CC1                   | 1             | 1    | 1    | 1   | 3    | 1    | 1    | 1   | 1                             | I-1a | CC18                 | 18            | 5   | 9   | 2   | 8   | 4   | 3   | 3   | 5    | 6   |
|                   | HL046PA2 | 1   | IA        | IA-1  | IA1                             | CC1                   | 1             | 1    | 1    | 1   | 3    | 1    | 1    | 1   | 1                             | I-1a | CC18                 | 59            | 5   | 9   | 2   | 8   | 9   | 3   | 3   | 5    | 6   |
|                   | HL002PA2 | 1   | IA        | IA-1  | IA1                             | CC1                   | 1             | 1    | 1    | 1   | 3    | 1    | 1    | 1   | 1                             | I-1a | CC18                 | 59            | 5   | 9   | 2   | 8   | 9   | 3   | 3   | 5    | 6   |
|                   | HL002PA3 | 1   | IA        | IA-1  | IA1                             | CC1                   | 1             | 1    | 1    | 1   | 3    | 1    | 1    | 1   | 1                             | I-1a | CC18                 | 59            | 5   | 9   | 2   | 8   | 9   | 3   | 3   | 5    | 6   |
|                   | HL078PA1 | 1   | IA        | NA    | IA1                             | CC3                   | 14            | 1    | 1    | 1   | 3    | 1    | 14   | 2   | 3                             | NA   | Singleton            | 63            | 8   | 4   | 5   | 8   | 11  | 8   | 3   | 5    | 11  |
|                   | SK137    | 1   | IA        | IA-2  | IA1                             | CC3                   | 18            | 8    | 1    | 1   | 3    | 1    | 1    | 2   | 5                             | I-1a | CC3                  | 3             | 5   | 9   | 4   | 8   | 5   | 3   | 3   | 5    | 11  |
|                   | SK182    | 1   | IA        | IA-2  | IA1                             | CC3                   | 29            | 1    | 13   | 1   | 3    | 1    | 1    | 2   | 5                             | I-1a | CC3                  | 3             | 5   | 9   | 4   | 8   | 5   | 3   | 3   | 5    | 11  |
|                   | HL106PA2 | 1   | IA        | IA-2  | IA1                             | CC3                   | 3             | 1    | 1    | 1   | 3    | 1    | 1    | 2   | 2                             | I-1a | CC3                  | 3             | 5   | 9   | 4   | 8   | 5   | 3   | 3   | 5    | 11  |
|                   | HL099PA1 | 4   | IA        | IA-2  | IA1                             | CC3                   | 3             | 1    | 1    | 1   | 3    | 1    | 1    | 2   | 2                             | I-1a | CC3                  | 3             | 5   | 9   | 4   | 8   | 5   | 3   | 3   | 5    | 11  |
|                   | HL083PA1 | 1   | IA        | IA-2  | IA1                             | CC3                   | 3             | 1    | 1    | 1   | 3    | 1    | 1    | 2   | 2                             | I-1a | CC3                  | 3             | 5   | 9   | 4   | 8   | 5   | 3   | 3   | 5    | 11  |
|                   | HL038PA1 | 4   | IA        | IA-2  | IA1                             | CC3                   | 10            | 1    | 1    | 1   | 3    | 1    | 1    | 2   | 4                             | I-1a | CC3                  | 3             | 5   | 9   | 4   | 8   | 5   | 3   | 3   | 5    | 11  |
|                   | HL005PA1 | 4   | IA        | IA-2  | IA1                             | CC3                   | 11            | 1    | 1    | 1   | 3    | 1    | 1    | 5   | 2                             | I-1a | CC3                  | 3             | 5   | 9   | 4   | 8   | 5   | 3   | 3   | 5    | 11  |
|                   | HL074PA1 | 4   | IA        | IA-2  | IA1                             | CC3                   | 3             | 1    | 1    | 1   | 3    | 1    | 1    | 2   | 2                             | I-1a | CC3                  | 3             | 5   | 9   | 4   | 8   | 5   | 3   | 3   | 5    | 11  |
|                   | HL007PA1 | 4   | IA        | IA-2  | IA1                             | CC3                   | 3             | 1    | 1    | 1   | 3    | 1    | 1    | 2   | 2                             | I-1a | CC3                  | 3             | 5   | 9   | 4   | 8   | 5   | 3   | 3   | 5    | 11  |
|                   | HL045PA1 | 4   | IA        | IA-2  | IA1                             | CC3                   | 17            | 1    | 10   | 1   | 3    | 1    | 1    | 2   | 2                             | I-1a | CC3                  | 3             | 5   | 9   | 4   | 8   | 5   | 3   | 3   | 5    | 11  |
|                   | HL096PA1 | 5   | IA        | IA-2  | IA1                             | CC3                   | 3             | 1    | 1    | 1   | 3    | 1    | 1    | 2   | 2                             | I-1a | CC3                  | 3             | 5   | 9   | 4   | 8   | 5   | 3   | 3   | 5    | 11  |
|                   | HL096PA2 | 5   | IA        | IA-2  | IA1                             | CC3                   | 3             | 1    | 1    | 1   | 3    | 1    | 1    | 2   | 2                             | I-1a | CC3                  | 3             | 5   | 9   | 4   | 8   | 5   | 3   | 3   | 5    | 11  |
|                   | HL043PA1 | 5   | IA        | IA-2  | IA1                             | CC3                   | 3             | 1    | 1    | 1   | 3    | 1    | 1    | 2   | 2                             | I-1a | CC3                  | 58            | 10  | 9   | 4   | 8   | 5   | 3   | 3   | 5    | 11  |
|                   | HL043PA2 | 5   | IA        | IA-2  | IA1                             | CC3                   | 3             | 1    | 1    | 1   | 3    | 1    | 1    | 2   | 2                             | I-1a | CC3                  | 58            | 10  | 9   | 4   | 8   | 5   | 3   | 3   | 5    | 11  |
|                   | HL053PA1 | 4   | IA        | IA-2  | IA1                             | CC3                   | 3             | 1    | 1    | 1   | 3    | 1    | 1    | 2   | 2                             | I-1a | CC3                  | 3             | 5   | 9   | 4   | 8   | 5   | 3   | 3   | 5    | 11  |
|                   | HL056PA1 | 4   | IA        | IA-2  | IA1                             | CC3                   | 3             | 1    | 1    | 1   | 3    | 1    | 1    | 2   | 2                             | I-1a | CC3                  | 3             | 5   | 9   | 4   | 8   | 5   | 3   | 3   | 5    | 11  |
|                   | HL025PA1 | 1   | IB        | NA    | IA1                             | CC4                   | 4             | 1    | 1    | 1   | 3    | 1    | 1    | 8   | 6                             | I-1a | CC28                 | 27            | 5   | 9   | 4   | 6   | 4   | 3   | 3   | 2    | 11  |
|                   | SK187    | 3   | IB        | NA    | NA                              | Singleton             | 19            | 16   | 1    | 1   | 15   | 1    | 4    | 8   | 6                             | I-1a | CC28                 | 67            | 5   | 9   | 4   | 3   | 4   | 3   | 3   | 2    | 11  |
|                   | HL086PA1 | 8   | IB        | IB-1  | IA1                             | CC4                   | 4             | 1    | 1    | 1   | 3    | 1    | 1    | 8   | 6                             | I-1b | CC31                 | 31            | 8   | 9   | 5   | 3   | 4   | 3   | 3   | 2    | 7   |
|                   | HL082PA1 | 8   | IB        | IB-1  | IA1                             | CC4                   | 4             | 1    | 1    | 1   | 3    | 1    | 1    | 8   | 6                             | I-1b | CC31                 | 31            | 8   | 9   | 5   | 3   | 4   | 3   | 3   | 2    | 7   |
|                   | HL110PA2 | 8   | IB        | IB-1  | IA1                             | CC4                   | 21            | 1    | 1    | 1   | 1    | 1    | 1    | 8   | 6                             | I-1b | CC31                 | 31            | 8   | 9   | 5   | 3   | 4   | 3   | 3   | 2    | 7   |
|                   | HL053PA2 | 8   | IB        | IB-1  | IA1                             | CC4                   | 4             | 1    | 1    | 1   | 3    | 1    | 1    | 8   | 6                             | I-1b | CC31                 | 31            | 8   | 9   | 5   | 3   | 4   | 3   | 3   | 2    | 7   |
|                   | HL092PA1 | 8   | IB        | IB-1  | IA1                             | CC4                   | 4             | 1    | 1    | 1   | 3    | 1    | 1    | 8   | 6                             | I-1b | CC31                 | 31            | 8   | 9   | 5   | 3   | 4   | 3   | 3   | 2    | 7   |
|                   | HL110PA1 | 8   | IB        | IB-1  | IA1                             | CC4                   | 4             | 1    | 1    | 1   | 3    | 1    | 1    | 8   | 6                             | I-1b | CC31                 | 31            | 8   | 9   | 5   | 3   | 4   | 3   | 3   | 2    | 7   |
|                   | HL030PA2 | 3   | IB        | IB-2  | IA2                             | Singleton             | 22            | 1    | 1    | 1   | 5    | 3    | 5    | 8   | 7                             | I-1a | CC28                 | 66            | 9   | 9   | 4   | 3   | 4   | 3   | 3   | 2    | 11  |
|                   | HL063PA2 | 3   | IB        | IB-2  | IA2                             | Singleton             | 23            | 1    | 18   | 1   | 5    | 3    | 5    | 8   | 8                             | I-1a | CC28                 | 70            | 7   | 9   | 4   | 3   | 4   | 3   | 3   | 2    | 11  |
|                   | P.acn17  | 3   | IB        | IB-2  | IA2                             | CC2                   | 22            | 1    | 1    | 1   | 5    | 3    | 5    | 8   | 7                             | I-1a | CC28                 | 70            | 7   | 9   | 4   | 3   | 4   | 3   | 3   | 2    | 11  |
|                   | HL037PA1 | 3   | IB        | IB-2  | IA2                             | CC2                   | 2             | 1    | 1    | 1   | 5    | 1    | 4    | 8   | 2                             | I-1a | CC28                 | 67            | 5   | 9   | 4   | 3   | 4   | 3   | 3   | 2    | 11  |
|                   | P.acn31  | 3   | IB        | IB-2  | IA2                             | CC2                   | 36            | 1    | 1    | 1   | 13   | 1    | 4    | 8   | 2                             | I-1a | CC28                 | 67            | 5   | 9   | 4   | 3   | 4   | 3   | 3   | 2    | 11  |
|                   | P.acn33  | 3   | IB        | IB-2  | IA2                             | CC2                   | 2             | 1    | 1    | 1   | 5    | 1    | 4    | 8   | 2                             | NA   | NA                   | NA            | 5   | 8   | 4   | 3   | 4   | 3   | 3   | NA   | 11  |
|                   | HL059PA1 | 16  | IB        | IB-2  | IA2                             | CC2                   | 2             | 1    | 1    | 1   | 5    | 1    | 4    | 8   | 2                             | I-1a | CC28                 | 28            | 5   | 8   | 4   | 3   | 4   | 3   | 3   | 2    | 11  |
|                   | HL059PA2 | 16  | IB        | IB-2  | IA2                             | CC2                   | 2             | 1    | 1    | 1   | 5    | 1    | 4    | 8   | 2                             | I-1a | CC28                 | 28            | 5   | 8   | 4   | 3   | 4   | 3   | 3   | 2    | 11  |
|                   | HL025PA2 | 3   | IB        | IB-2  | IA2                             | CC2                   | 2             | 1    | 1    | 1   | 5    | 1    | 4    | 8   | 2                             | I-1a | CC28                 | 65            | 5   | 8   | 4   | 3   | 4   | 3   | 3   | 2    | 16  |
|                   | HL005PA4 | 3   | IB        | IB-2  | IA2                             | CC2                   | 2             | 1    | 1    | 1   | 5    | 1    | 4    | 8   | 2                             | I-1a | CC28                 | 28            | 5   | 8   | 4   | 3   | 4   | 3   | 3   | 2    | 11  |
|                   | HL067PA1 | 3   | IB        | IB-2  | IA2                             | CC2                   | 24            | 1    | 1    | 1   | 5    | 1    | 4    | 8   | 9                             | I-1a | CC28                 | 64            | 5   | 8   | 4   | 3   | 4   | 3   | 3   | 2    | 15  |
|                   | HL002PA1 | 3   | IB        | IB-2  | IA2                             | CC2                   | 2             | 1    | 1    | 1   | 5    | 1    | 4    | 8   | 2                             | I-1a | CC28                 | 28            | 5   | 8   | 4   | 3   | 4   | 3   | 3   | 2    | 11  |
|                   | HL027PA1 | 3   | IB        | IB-2  | IA2                             | CC2                   | 2             | 1    | 1    | 1   | 5    | 1    | 4    | 8   | 2                             | I-1a | CC28                 | 28            | 5   | 8   | 4   | 3   | 4   | 3   | 3   | 2    | 11  |
|                   | HL046PA1 | 3   | IB        | IB-2  | IA2                             | CC2                   | 2             | 1    | 1    | 1   | 5    | 1    | 4    | 8   | 2                             | I-1a | CC28                 | 28            | 5   | 8   | 4   | 3   | 4   | 3   | 3   | 2    | 11  |
|                   | HL083PA2 | 3   | IB        | IB-2  | IA2                             | CC2                   | 2             | 1    | 1    | 1   | 5    | 1    | 4    | 8   | 2                             | I-1a | CC28                 | 28            | 5   | 8   | 4   | 3   | 4   | 3   | 3   | 2    | 11  |
|                   | HL013PA1 | 3   | IB        | IB-2  | IA2                             | CC2                   | 2             | 1    | 1    | 1   | 5    | 1    | 4    | 8   | 2                             | I-1a | CC28                 | 28            | 5   | 8   | 4   | 3   | 4   | 3   | 3   | 2    | 11  |
|                   | HL050PA1 | 3   | IB        | IB-2  | IA2                             | Singleton             | 91            | 1    | 1    | 1   | 5    | 1    | 4    | 9   | 2                             | I-1a | CC28                 | 28            | 5   | 8   | 4   | 3   | 4   | 3   | 3   | 2    | 11  |
|                   | HL050PA3 | 3   | IB        | IB-2  | IA2                             | CC2                   | 2             | 1    | 1    | 1   | 5    | 1    | 4    | 8   | 2                             | I-1a | CC28                 | 28            | 5   | 8   | 4   | 3   | 4   | 3   | 3   | 2    | 11  |
|                   | HL087PA1 | 3   | IB        | IB-2  | IA2                             | CC2                   | 2             | 1    | 1    | 1   | 5    | 1    | 4    | 8   | 2                             | I-1a | CC28                 | 28            | 5   | 8   | 4   | 3   | 4   | 3   | 3   | 2    | 11  |
|                   | HL087PA3 | 3   | IB        | IB-2  | IA2                             | CC2                   | 2             | 1    | 1    | 1   | 5    | 1    | 4    | 8</ |                               |      |                      |               |     |     |     |     |     |     |     |      |     |
