# Supplementary material for: Pan-Genome and Comparative Genome Analyses of Propionibacterium acnes Reveal Its Genomic Diversity in the Healthy and Diseased Human Skin Microbiome
Source: PubMed Central journal article supplement — mBio. 2013 Apr 30;4(3):e00003-13. doi: 10.1128/mBio.00003-13 (PMC3663185; doi:10.1128/mbio.00003-13), 2013-04-30
Supplement: mbo002131499st2.pdf [file mbo002131499st2.pdf]

Table S2. CRISPR spacer sequences found in the genomes of ATCC 11828, HL042PA3 and HL202PA1.

| Strain    | Ribotype | Spacer | Protospacer                        | BLAST result                                                                                                                                                                                                             | Match found in |
|-----------|----------|--------|------------------------------------|--------------------------------------------------------------------------------------------------------------------------------------------------------------------------------------------------------------------------|----------------|
| ATCC11828 | RT2      | 1      | CATCTGCCAACGAGCGAGAGTGGCGCGGTGTTC  | No hits                                                                                                                                                                                                                  |                |
|           |          | 2      | CGAGGGCTACCACGTGGTCGATTTGGACTGTCTG | <i>Clostridium leptum</i> DSM 753, CLOLEP_00167,<br><i>Propionibacterium acnes</i> SK137, HMPREF0675_3193 (Domain of unknown function)                                                                                   | Locus 2        |
|           |          | 3      | CAGGCGCTCCACTCCCTCGCCCTGGCCACCAAC  | No hits                                                                                                                                                                                                                  |                |
| HL042PA3  | RT6      | 1      | CTGACTGGTTTGGGTCATACGTCTTCTGACACG  | <i>Propionibacterium acnes</i> phage PA6 gp14 (tape measure protein)<br><i>Propionibacterium acnes</i> phage PAD20 gp14 (Tape measure protein)<br><i>Propionibacterium acnes</i> phage PAS50 gp14 (Tape measure protein) |                |
|           |          | 2      | TCACAGGCCACGCAGGCACATCACCTTATTAG   | <i>Propionibacterium acnes</i> phage PA6 gp15 (Minor tail protein)<br><i>Propionibacterium acnes</i> phage PAD20 gp15 (Minor tail protein)<br><i>Propionibacterium acnes</i> phage PAS50 gp15 (Minor tail protein)       |                |
|           |          | 3      | CTCCCCCTCCTCCCCGGGAGGAAAAGCAGACCA  | <i>Propionibacterium acnes</i> phage PAS50 gp15 (Minor tail protein)                                                                                                                                                     |                |
|           |          | 4      | CGAGGGCTACCACGTGGTCGATTTGGACTGTCTG | <i>Clostridium leptum</i> DSM 753, CLOLEP_00167,<br><i>Propionibacterium acnes</i> SK137, HMPREF0675_3193 (Domain of unknown function)                                                                                   | Locus 2        |
| HL202PA1  | RT6      | 1      | CGAGGGCTACCACGTGGTCGATTTGGACTGTCTG | <i>Clostridium leptum</i> DSM 753, CLOLEP_00167,<br><i>Propionibacterium acnes</i> SK137, HMPREF0675_3193 (Domain of unknown function)                                                                                   | Locus 2        |
|           |          | 2      | CAGGCGCTCCACTCCCTCGCCCTGGCCACCAAC  | No hits                                                                                                                                                                                                                  |                |
