# Supplementary figures and images for: Pan-Genome and Comparative Genome Analyses of Propionibacterium acnes Reveal Its Genomic Diversity in the Healthy and Diseased Human Skin Microbiome
Source: PubMed Central journal article supplement — mBio. 2013 Apr 30;4(3):e00003-13. doi: 10.1128/mBio.00003-13 (PMC3663185; doi:10.1128/mbio.00003-13), 2013-04-30

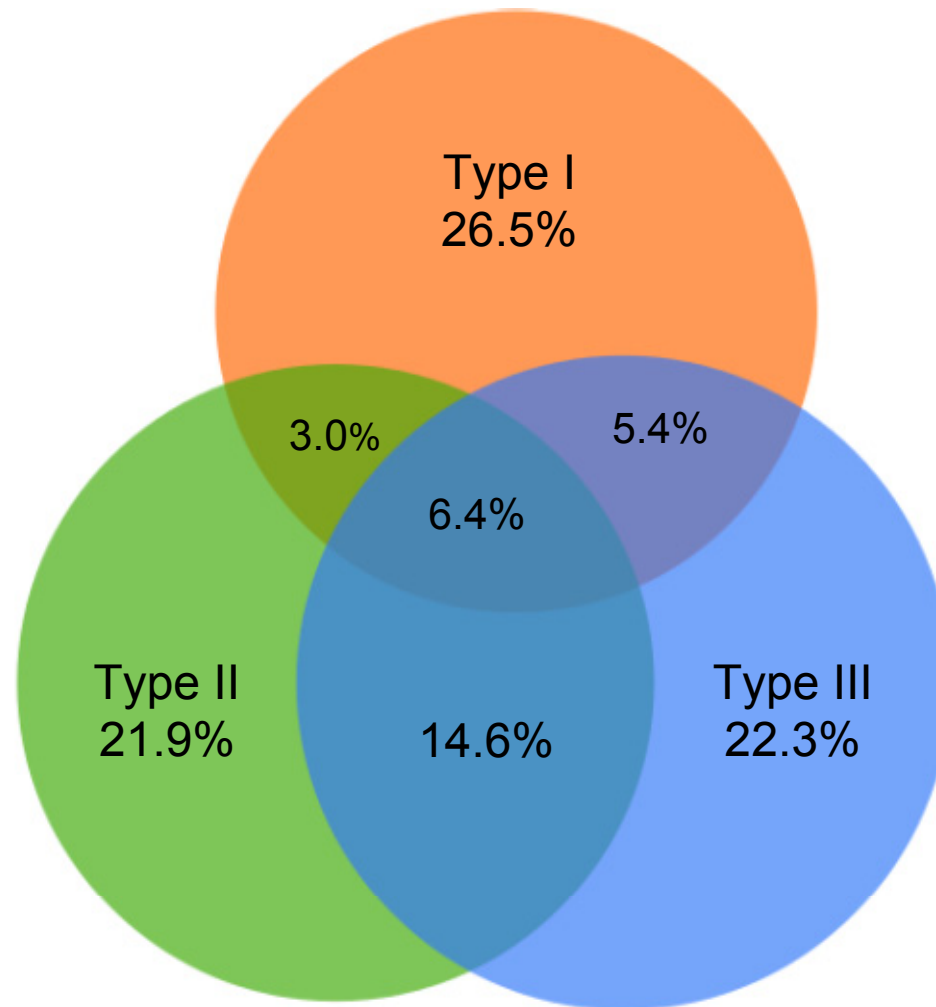

Figure S1. Proportion of the 123,223 SNPs in the core regions specific to *recA* types I, II and III.

Supplement: mbo002131499sf01.pdf [file mbo002131499sf01.pdf]
